# Supplementary material for: Vertically sheathing laminar flow-based immunoassay using simultaneous diffusion-driven immune reactions
Source: RSC Adv. 2019 Jul 31;9(41):23791–6. doi: 10.1039/c9ra03855h (PMC9069447; doi:10.1039/c9ra03855h)

## **Supplementary Information**

### **Vertically sheathing laminar flow-based immunoassay using simultaneous diffusion-driven immune reactions**

**Amanzhol Kurmashev<sup>a, †</sup>, Seyong Kwon<sup>a, †</sup>, Je-Kyun Park<sup>b</sup> and Joo H. Kang<sup>\*a</sup>**

<sup>a</sup>Department of Biomedical Engineering, School of Life Sciences, Ulsan National Institute of Science and Technology (UNIST), Ulsan, Republic of Korea. Email: jookang@unist.ac.kr

<sup>b</sup>Department of Bio and Brain Engineering, Korea Advanced Institute of Science and Technology (KAIST), Daejeon, Republic of Korea.

---

### **SUPPLEMENTARY FIGURE LEGENDS**

**Fig. S1** A configuration of the pressing device used for reversible bonding. The upper plate combined with a microfluidic device is placed on the aldehyde glass slide, and a weight is mounted on the upper plate to create reversible sealing.

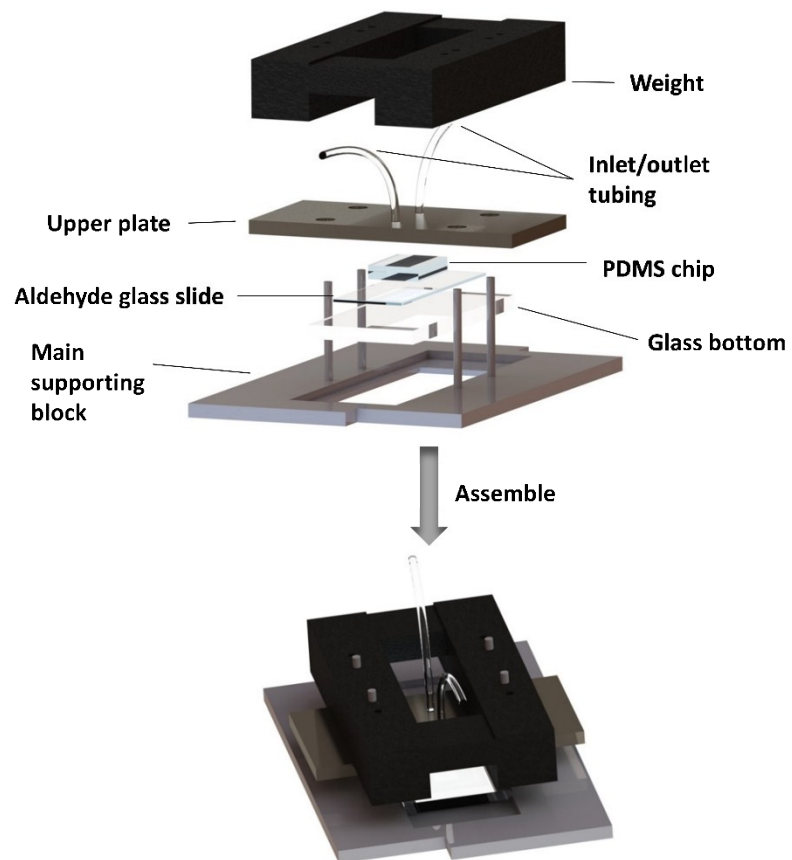

Supplement: RA-009-C9RA03855H-s001 [file RA-009-C9RA03855H-s001.pdf]
